# Supplementary material
Source: PubMed Central journal article supplement (PMC3670360)
Supplement: 1212562110_pnas.201212562SI.pdf [file 1212562110_pnas.201212562SI.pdf]

# Supporting Information

Palmer et al. 10.1073/pnas.1212562110

## SI Text

In this section, we analyzed the face-color associations for each color appearance dimension. For saturation, the colors were that were chosen as appropriate for neutral/calm faces, and both levels of sad faces were quite desaturated (i.e., grayish) (Fig. 6), perhaps because the pictures themselves were gray-scale. Relative to this baseline, however, colors of increasingly higher saturation were chosen for both happier faces [ $F(2,46) = 36.37, P < 0.001$ ] and angrier faces [ $F(2,46) = 11.28, P < 0.001$ ], with those for happy faces being more saturated than those for angry faces [ $F(1,23) = 14.86, P < 0.01$ ]. For lightness, the colors chosen as appropriate for happy faces were reliably lighter [ $F(2,46) = 13.33, P < 0.001$ ] than neutral faces and those for angry faces

[ $F(2,46) = 35.06, P < 0.001$ ] and very sad faces [ $F(2,46) = 17.42, P < 0.001$ ] were reliably darker than neutral, with colors for angry faces being darker than colors for sad faces [ $F(1,32) = 21.72, P < 0.001$ ]. For redness/greenness, neutral and sad faces were slightly greenish, with very happy faces being redder than very sad faces [ $F(1,23) = 5.66, P < 0.05$ ], and both levels of angry faces being reliably redder (or less greenish) than the sad faces [ $F(1,23) = 55.39, P < 0.001$ ]. For yellowness/blueness, neutral, angry, and slightly sad faces were associated with slightly bluish colors, very sad faces being more strongly associated with bluish colors than very angry faces [ $F(1,23) = 13.33, P < 0.001$ ] and both levels of happy faces were reliably associated with yellower colors than angry faces [ $F(1,23) = 20.00, P < 0.001$ ].

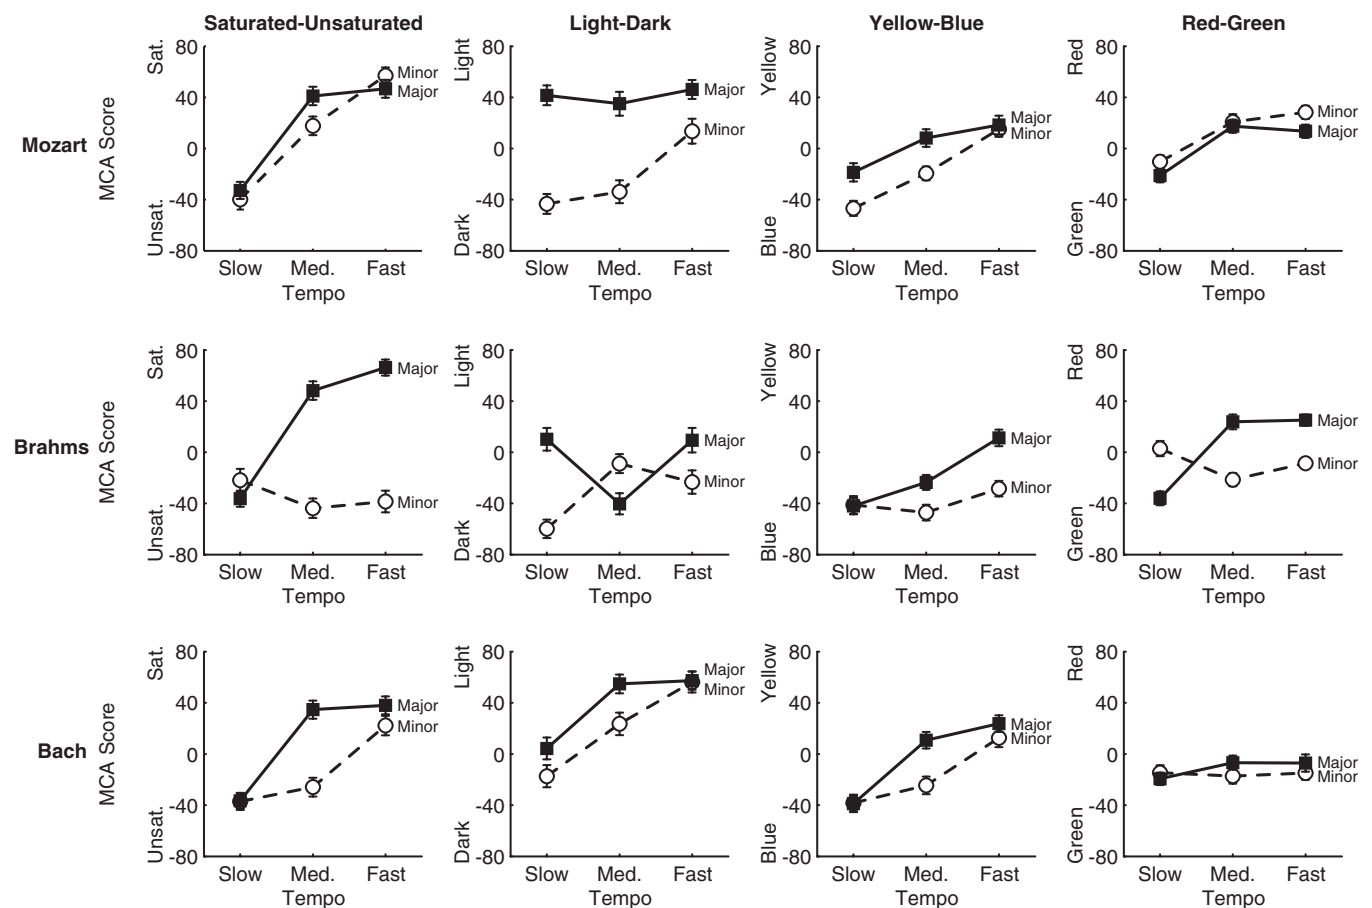

Fig. S1. Dimensional color associations for music composed by Mozart, Brahms, and Bach at slow/medium/fast tempi and in major/minor mode. The colors chosen as most/least consistent with the music for the saturation, lightness, yellowness/blueness, and redness/greenness dimensions were computed using the music-color association index (MCA) defined by Eqs. 1–3. (Error bars represent SEMs.)







**Table S1. International Commission on Illumination (CIE) 1931 xyY values and Munsell values for the 32 chromatic colors and CIE 1931 xyY values for the five achromatic colors (CIE Illuminant C)**

| Hue        | Cut        | CIE 1931 x | CIE 1931 y | CIE 1931 Y | Hue    | Value/chroma |
|------------|------------|------------|------------|------------|--------|--------------|
| Red        | Saturated  | 0.549      | 0.313      | 22.93      | 5 R    | 5/15         |
|            | Light      | 0.407      | 0.326      | 49.95      | 5 R    | 7/8          |
|            | Muted      | 0.441      | 0.324      | 22.93      | 5 R    | 5/8          |
|            | Dark       | 0.506      | 0.311      | 7.60       | 5 R    | 3/8          |
| Orange     | Saturated  | 0.513      | 0.412      | 49.95      | 5 YR   | 7/13         |
|            | Light      | 0.399      | 0.366      | 68.56      | 5 YR   | 8/6          |
|            | Muted      | 0.423      | 0.375      | 34.86      | 5 YR   | 6/6          |
|            | Dark       | 0.481      | 0.388      | 10.76      | 5 YR   | 3.5/6        |
| Yellow     | Saturated  | 0.446      | 0.472      | 91.25      | 5 Y    | 9/12         |
|            | Light      | 0.391      | 0.413      | 91.25      | 5 Y    | 9/6.5        |
|            | Muted      | 0.407      | 0.426      | 49.95      | 5 Y    | 7/6.5        |
|            | Dark       | 0.437      | 0.450      | 18.43      | 5 Y    | 5/6.5        |
| Chartreuse | Saturated  | 0.387      | 0.504      | 68.56      | 5 GY   | 8/11         |
|            | Light      | 0.357      | 0.420      | 79.90      | 5 GY   | 8.5/6        |
|            | Muted      | 0.360      | 0.436      | 42.40      | 5 GY   | 6.5/6        |
|            | Dark       | 0.369      | 0.473      | 18.43      | 5 GY   | 4.5/6        |
| Green      | Saturated  | 0.254      | 0.449      | 42.40      | 3.75 G | 6.5/11.5     |
|            | Light      | 0.288      | 0.381      | 63.90      | 3.75 G | 7.75/6.25    |
|            | Muted      | 0.281      | 0.392      | 34.86      | 3.75 G | 6/6.25       |
|            | Dark       | 0.261      | 0.419      | 12.34      | 3.75 G | 3.75/6.25    |
| Cyan       | Saturated  | 0.226      | 0.335      | 49.95      | 5 BG   | 7/9          |
|            | Light      | 0.267      | 0.330      | 68.56      | 5 BG   | 8/5          |
|            | Muted      | 0.254      | 0.328      | 34.86      | 5 BG   | 6/5          |
|            | Dark       | 0.233      | 0.324      | 13.92      | 5 BG   | 4/5          |
| Blue       | Saturated  | 0.200      | 0.230      | 34.86      | 10 B   | 6/10         |
|            | Light      | 0.255      | 0.278      | 59.25      | 10 B   | 7.5/5.5      |
|            | Muted      | 0.241      | 0.265      | 28.90      | 10 B   | 5.5/5.5      |
|            | Dark       | 0.212      | 0.236      | 10.76      | 10 B   | 3.5/5.5      |
| Purple     | Saturated  | 0.272      | 0.156      | 18.43      | 5 P    | 4.5/17       |
|            | Light      | 0.290      | 0.242      | 49.95      | 5 P    | 7/9          |
|            | Muted      | 0.287      | 0.222      | 22.93      | 5 P    | 5/9          |
|            | Dark       | 0.280      | 0.181      | 7.60       | 5 P    | 3/9          |
| Achromatic | Black      | 0.310      | 0.316      | 0.30       |        |              |
|            | Dark gray  | 0.310      | 0.316      | 12.34      |        |              |
|            | Med Gray   | 0.310      | 0.316      | 31.88      |        |              |
|            | Light Gray | 0.310      | 0.316      | 63.90      |        |              |
|            | White      | 0.310      | 0.316      | 116.00     |        |              |

Table adapted from Schloss et al. (1).

- Schloss KB, Poggesi RM, Palmer SE (2011) Effects of university affiliation and "school spirit" on color preferences: Berkeley versus Stanford. *Psychon Bull Rev* 18(3):498–504.

**Table S2. Musical selections from experiments 1 and 3**

| Composer/mode/tempo | Selection                                                                            |
|---------------------|--------------------------------------------------------------------------------------|
| Bach major fast     | Brandenburg Concerto no. 2 in F major, BWV 1047, Allegro assai                       |
| Bach major medium   | Brandenburg Concerto no. 3 in G major, BWV 1048, Ohne Satzbezeichnung                |
| Bach major slow     | Brandenburg Concerto no. 6 in B flat major, BWV 1051, Adagio ma non tanto            |
| Bach minor fast     | Orchestral Suite no. 2 in B minor, BWV 1067, Badinerie                               |
| Bach minor medium   | Orchestral Suite no. 2 in B minor, BWV 1067, Rondeau                                 |
| Bach minor slow     | Brandenburg Concerto no. 2 in F major, BWV 1047, Andante                             |
| Brahms major fast   | Symphony no. 4 in E minor, Opus 98, Allegro giocoso                                  |
| Brahms major medium | Symphony no. 3 in F major, Opus 90, Allegro con brio                                 |
| Brahms major slow   | Symphony no. 2 in D major, Opus 73, Allegro non troppo                               |
| Brahms minor fast   | Symphony no. 3 in F major, Opus 90, Allegro                                          |
| Brahms minor medium | Symphony no. 3 in F major, Opus 90, Poco allegretto                                  |
| Brahms minor slow   | Symphony no. 1 in C minor, Opus 68, Adagio                                           |
| Mozart major fast   | Symphony no. 39 in E flat major, K 543, Finale allegro                               |
| Mozart major medium | Symphony no. 39 in E flat major, K 543, Menuetto allegro                             |
| Mozart major slow   | Symphony no. 39 in E flat major, K 543, Andante                                      |
| Mozart minor fast   | Symphony no. 40 in G minor, KV 550, Allegro assai                                    |
| Mozart minor medium | Symphony no. 40 in G minor, KV 550, Menuetto allegro                                 |
| Mozart minor slow   | Sinfonia Concertante for Violin, Viola, and Orchestra in E flat major, K364, Andante |
